# Supplementary material for: Are incremental exercise relationships between rating of perceived exertion and oxygen uptake or heart rate reserve valid during steady-state exercises?
Source: PeerJ. 2024 May 3;12:e17158. doi: 10.7717/peerj.17158 (PMC11073009; doi:10.7717/peerj.17158)
Supplement: Data S1 [file peerj-12-17158-s001.xlsx]

## Sheet: Raw data
ID	RPE_SSE_15MIN_60HRR_ACTUAL	RPE_SSE_45MIN_60HRR_ACTUAL	RPE_SSE_15MIN_80HRR_ACTUAL	RPE_SSE_45MIN_80HRR_ACTUAL	RPE_SSE_15MIN_60HRR_VO2R_PREDICTED	RPE_SSE_45MIN_60HRR_VO2R_PREDICTED	RPE_SSE_15MIN_80HRR_VO2R_PREDICTED	RPE_SSE_45MIN_80HRR_VO2R_PREDICTED	RPE_SSE_15MIN_60HRR_HRR_PREDICTED	RPE_SSE_45MIN_60HRR_HRR_PREDICTED	RPE_SSE_15MIN_80HRR_HRR_PREDICTED	RPE_SSE_45MIN_80HRR_HRR_PREDICTED
1	9	14	11	14	11.315	10.0307	16.1472	13.5144	10.6452	11.2085	14.4059	14.4722
2	11	11	16	15	11.2831	11.2831	14.5639	14.792	11.494	11.781	15.3424	14.7516
3	12	15	15	18	10.4499	11.3525	14.5366	13.8596	11.6746	12.8035	16.3652	16.5598
4	10	12	13	15	7.05729	5.11556	14.3673	9.96989	7.57764	7.55159	12.865	12.3961
5	11	13	13	14	16.6719	15.7073	20.4565	16.5483	14.1542	14.0242	18.0343	17.2323
6	9	11	12	15	12.4488	11.2473	16.2756	14.0285	12.8509	12.3254	15.8117	15.7591
7	11	10	15	15	10.7982	9.95443	14.2308	13.9623	10.2895	10.3341	14.9021	14.813
8	12	12	13	12	12.137	13.0654	16.1829	14.1323	13.2287	14.1029	16.3759	16.1427
